# Supplementary material for: Engineering of Mn3O4@Ag microspheres assembled from nanosheets for superior O3 decomposition
Source: Royal Society of Chemistry journal article supplement (doi:10.1039/d2dt02711a), 2022-01-01
Supplement: d2dt02711a1.pdf [file d2dt02711a1.pdf]

## Supporting Information

### Engineering of Mn<sub>3</sub>O<sub>4</sub>@Ag Microsphere Assembled by Nanosheets for Superior O<sub>3</sub> Decomposition

#### 1 Catalyst Characterization and catalytic activity test

XRD (X-ray powder diffraction) patterns were collected on a Panalytical Aries X-ray diffractometer under Cu K<sub>α</sub> radiation. The data were obtained at a scan speed of 5 (°)·min<sup>-1</sup> from 10° to 80° with a step of 0.01°. The Raman spectra were obtained from a LabRAM HR800 UV Laser Raman spectrometer with a wavelength of 633 nm, with a power of 0.04 mW. FE-SEM (field emission scanning electron microscopy) was performed with electron microscopy (SU8220, Hitachi). HRTEM of the catalyst was performed on an FEI Themis Z instrument at 300 kV. N<sub>2</sub> adsorption-desorption experiments were performed with an Autosorb iQ2 (ANTON PAAR QUANTATEC INC) and all samples were degassed at 250 °C for 2 h at vacuum ambiance. Specific surface area was measured with the BET method, and average pore size distribution with the BJH method. The amount of Ag in Mn<sub>3</sub>O<sub>4</sub> was measured on inductively coupled plasma light emission spectroscopy (Agilent 5110). H<sub>2</sub>-TPR (hydrogen temperature-programmed reduction) and O<sub>2</sub>-TPD (oxygen temperature-programmed desorption) experiments were conducted with the Micro. AutoChem II 2920. During H<sub>2</sub>-TPR, 30 mg of the sample were preprocessed in Ar at 110 °C for 0.5 h. After cooling to room temperature, it was heated to 600 °C in 5% H<sub>2</sub>/Ar with a rate of 10 °C min<sup>-1</sup>.

For O<sub>2</sub>-TPD, 30 mg of catalyst was pretreated under He atmosphere at 110 °C for 30 min, and then cooled to room temperature, followed by exposing to O<sub>2</sub> for 30 min. Then, it was heated to 800 °C in flowing He. The signals were detected by TCD. Water desorption (H<sub>2</sub>O-TPD-MS) measurement was performed on a Hiden catlab test instrument equipped with a mass spectrometer. The catalyst was heated to 110°C under Ar and kept for 0.5 h to remove the adsorbed water and cooled to room temperature (30°C). Then saturated water (30°C) was introduced by Ar (40mL min<sup>-1</sup>) for 1 h; The supersaturated adsorbed water was removed by Ar. Finally, the catalyst was heated from 30°C to 600 °C, and the desorption signals were detected: 32(O<sub>2</sub>), 18(H<sub>2</sub>O), 44(CO<sub>2</sub>), 28(CO or N<sub>2</sub>). XPS (X-ray photoelectron spectroscopy) data was acquired with an VG MultiLab 2000 device employing an MgK<sub>α</sub> source. Thermogravimetric testing (TG) was performed on a thermogravimetric analyzer (NETZSCH STA449F5). The test conditions are: nitrogen atmosphere, heating at a rate of 10 °C min<sup>-1</sup>.

The catalytic activity was evaluated in a fixed-bed continuous flow reactor (8 mm inner diameter). 20 mg of catalyst was packed into the reactor at a gas hourly space velocity (GHSV) of 600 L g<sup>-1</sup> h<sup>-1</sup>. During the test, the temperature was maintained at 25°C and the relative humidity (RH) of the feed gas was maintained at 50%. Ozone was generated by a vacuum ultraviolet lamp, and the inlet and outlet ozone concentrations were analyzed using an ozone detector (Model 106-L, 2B Technologies, USA). The ozone conversion was calculated by the following equation:

$$\text{O}_3 \text{ conversion} = (C_{\text{in}} - C_{\text{out}}) / C_{\text{in}} \times 100\%$$

where C<sub>in</sub> and C<sub>out</sub> are the inlet and outlet concentration of ozone, respectively.

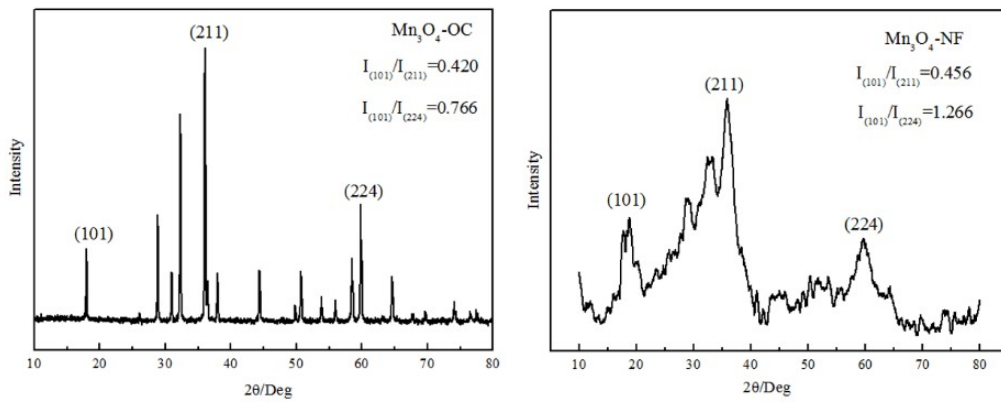

Fig.S1 Compare of XRD patterns of Mn<sub>3</sub>O<sub>4</sub>-OC and Mn<sub>3</sub>O<sub>4</sub>-NF

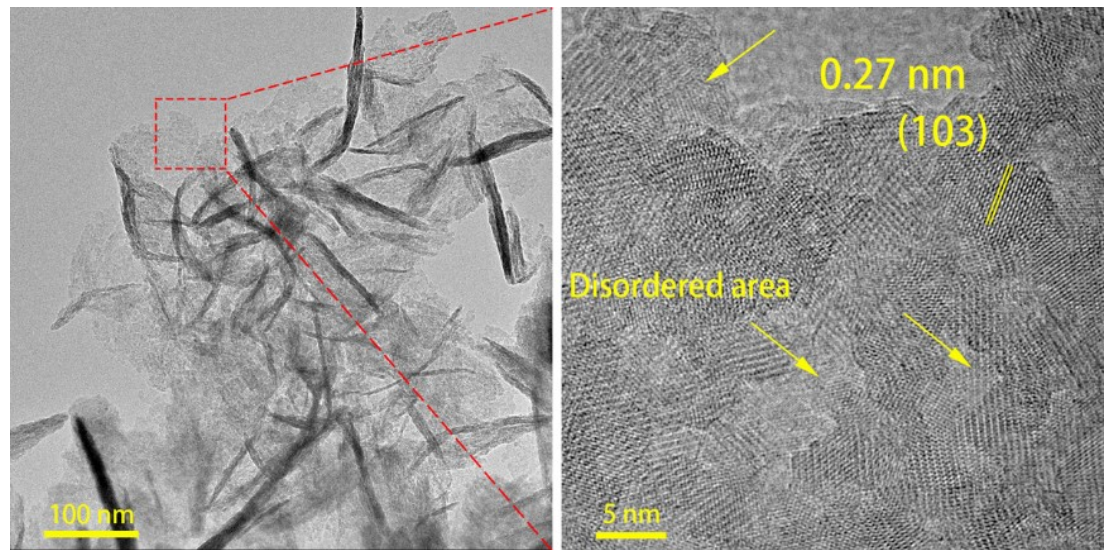

Fig.S2 the HRTEM image of Mn<sub>3</sub>O<sub>4</sub>-NF

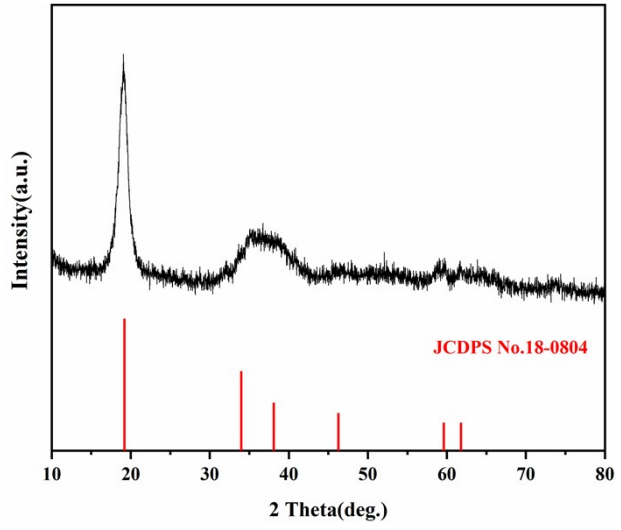

Fig.S3 the XRD pattern of the precursor β-MnOOH

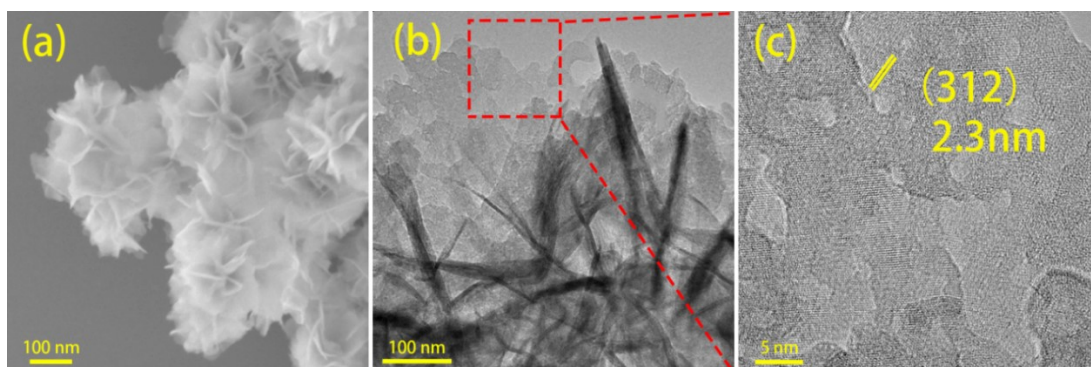

Fig.S4 the SEM (a) and HRTEM (b) image of the precursor  $\beta$ -MnOOH

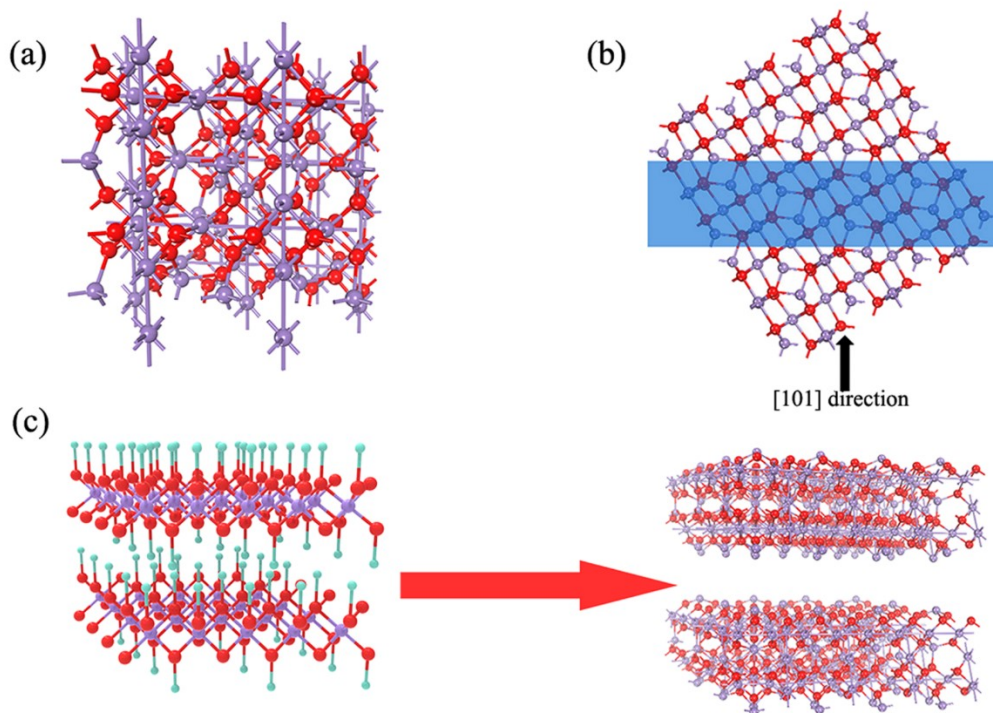

Fig.S5 Crystal structure of bulk  $\text{Mn}_3\text{O}_4$ . (b) Side-view of  $\text{Mn}_3\text{O}_4$  along b axis. (c) Schematic diagram of topochemical conversion from  $\beta$ -MnOOH nanosheets to  $\text{Mn}_3\text{O}_4$  nanosheets.

( the CIF file of  $\beta$ -MnOOH can not be found from the CrystallographyOpen Data website, its structure is referenced as reported in : *Inorg. Chem.* 2000, 39, 741 )

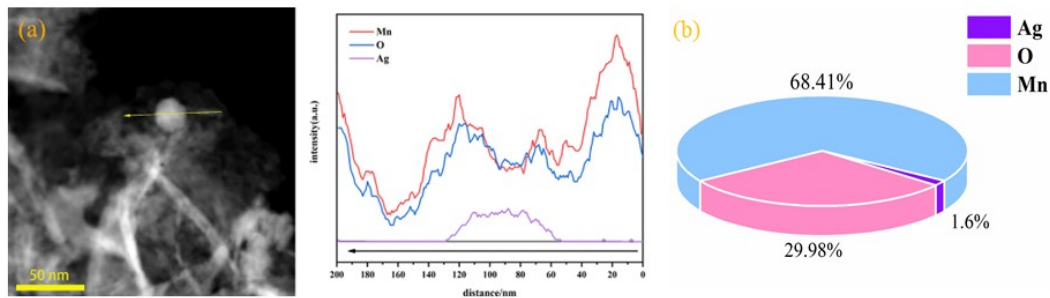

Fig.S6 the line-mapping of Ag@Mn<sub>3</sub>O<sub>4</sub>-NF(a) and ICP-OES result (b)

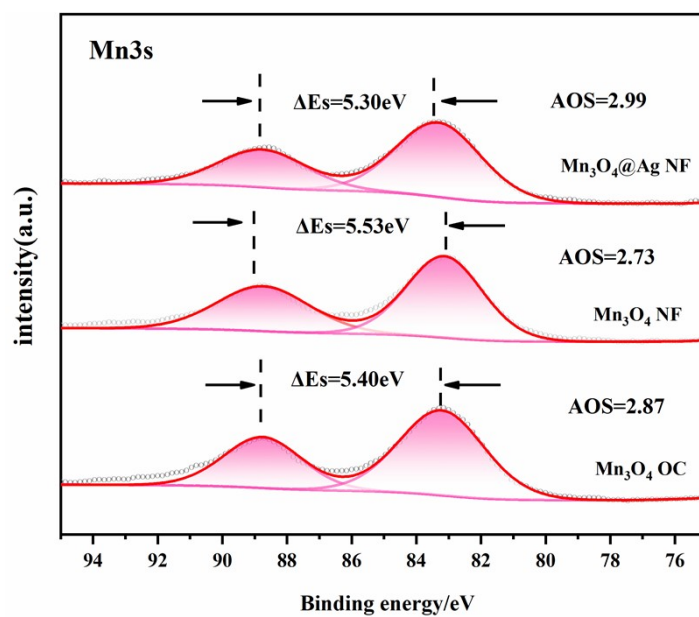

Fig.S7 the Mn3s spectra of Mn<sub>3</sub>O<sub>4</sub>-OC, Mn<sub>3</sub>O<sub>4</sub>-NF and Mn<sub>3</sub>O<sub>4</sub>@Ag-NF (AOS=8.956-1.126ΔEs)

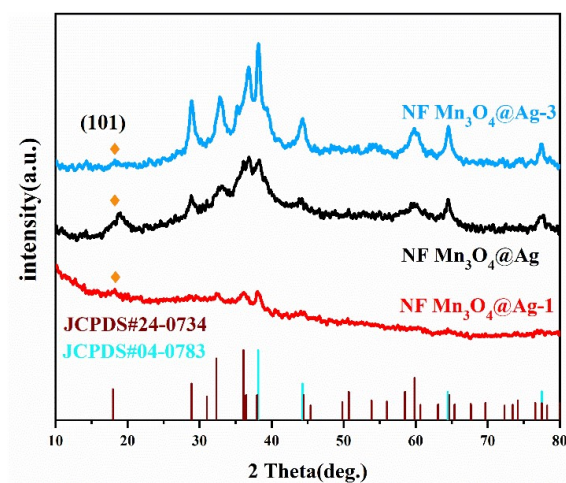

Fig. S8 the XRD patterns of Mn<sub>3</sub>O<sub>4</sub>@Ag-NF(1), Mn<sub>3</sub>O<sub>4</sub>@Ag-NF and Mn<sub>3</sub>O<sub>4</sub>@Ag-NF(3)

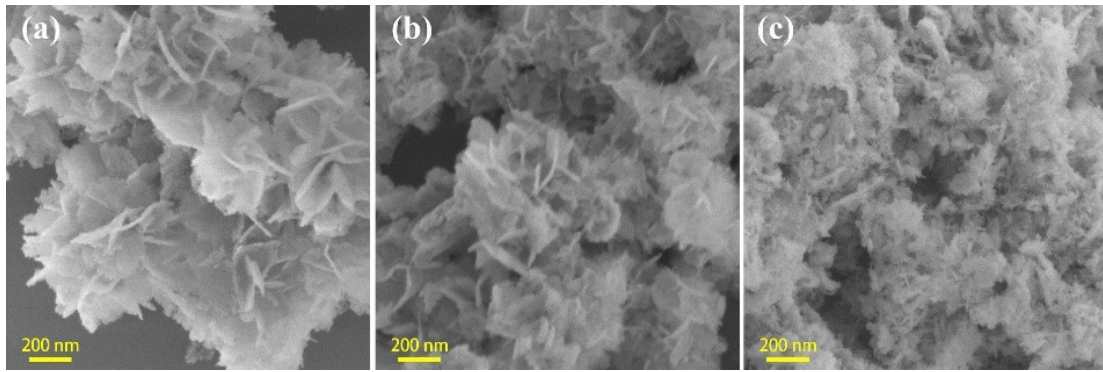

Fig. S9 SEM images of Mn<sub>3</sub>O<sub>4</sub>@Ag-NF(1)(a), Mn<sub>3</sub>O<sub>4</sub>@Ag-NF(b) and Mn<sub>3</sub>O<sub>4</sub>@Ag-NF(3) (c)

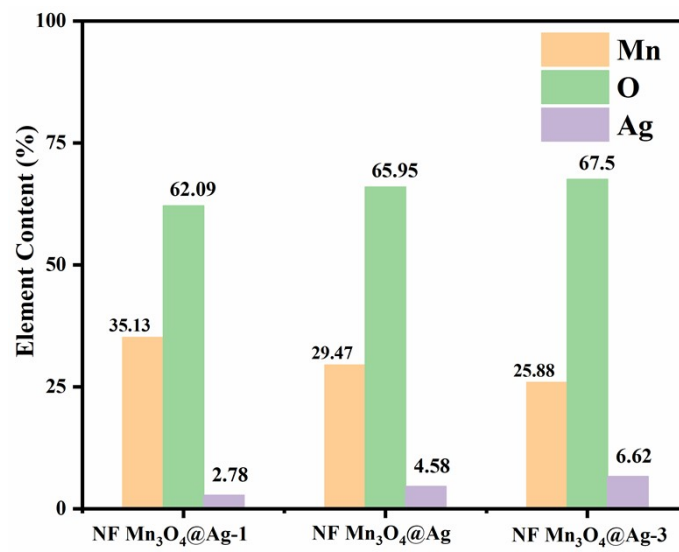

Fig. S10 The EDX of Mn<sub>3</sub>O<sub>4</sub>@Ag-NF(1), Mn<sub>3</sub>O<sub>4</sub>@Ag-NF and Mn<sub>3</sub>O<sub>4</sub>@Ag-NF(2)

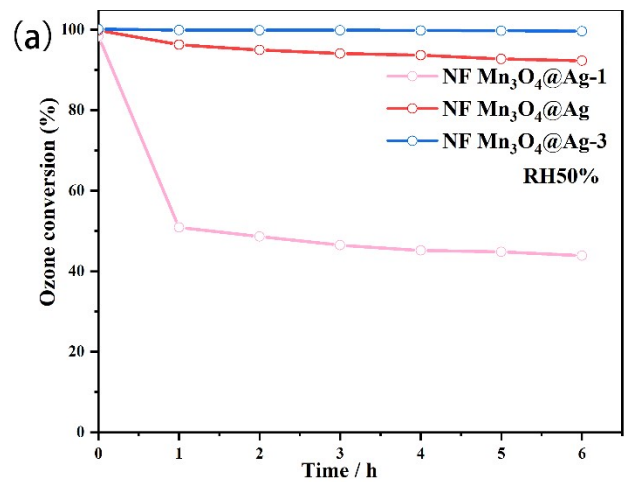

Fig.S11 Conversion of O<sub>3</sub> over Mn<sub>3</sub>O<sub>4</sub>@Ag-NF(1), Mn<sub>3</sub>O<sub>4</sub>@Ag-NF and Mn<sub>3</sub>O<sub>4</sub>@Ag-NF(3)

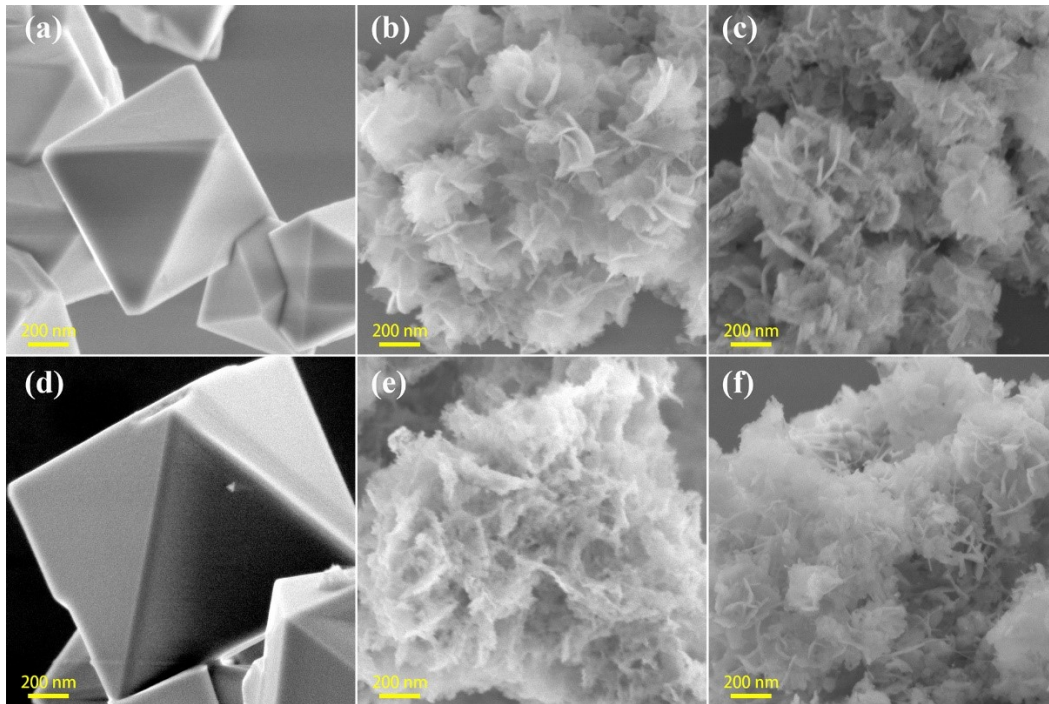

Fig. S12 SEM images before test:  $\text{Mn}_3\text{O}_4\text{-OC}$ (a),  $\text{Mn}_3\text{O}_4\text{-NF}$ (b) and  $\text{Mn}_3\text{O}_4\text{@Ag-NF}$ (c) and SEM images after test:  $\text{Mn}_3\text{O}_4\text{-OC}$ (d),  $\text{Mn}_3\text{O}_4\text{-NF}$ (e) and  $\text{Mn}_3\text{O}_4\text{@Ag-NF}$ (f)

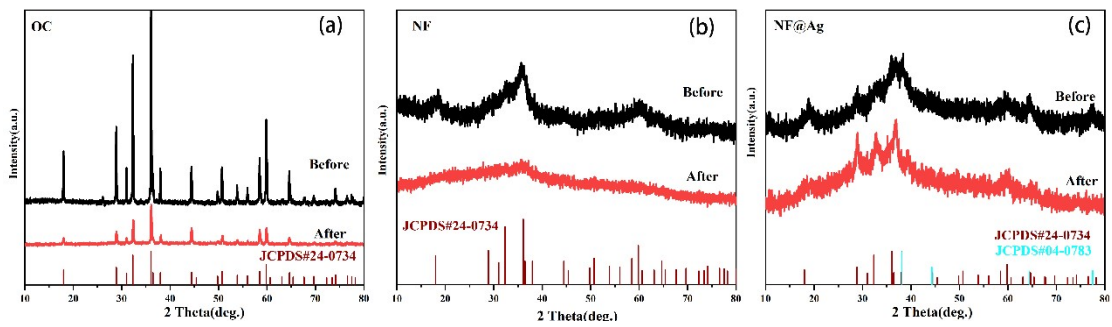

Fig. S13 The XRD before and after test:  $\text{Mn}_3\text{O}_4\text{-OC}$ (a),  $\text{Mn}_3\text{O}_4\text{-NF}$ (b) and  $\text{Mn}_3\text{O}_4\text{@Ag-NF}$ (c)

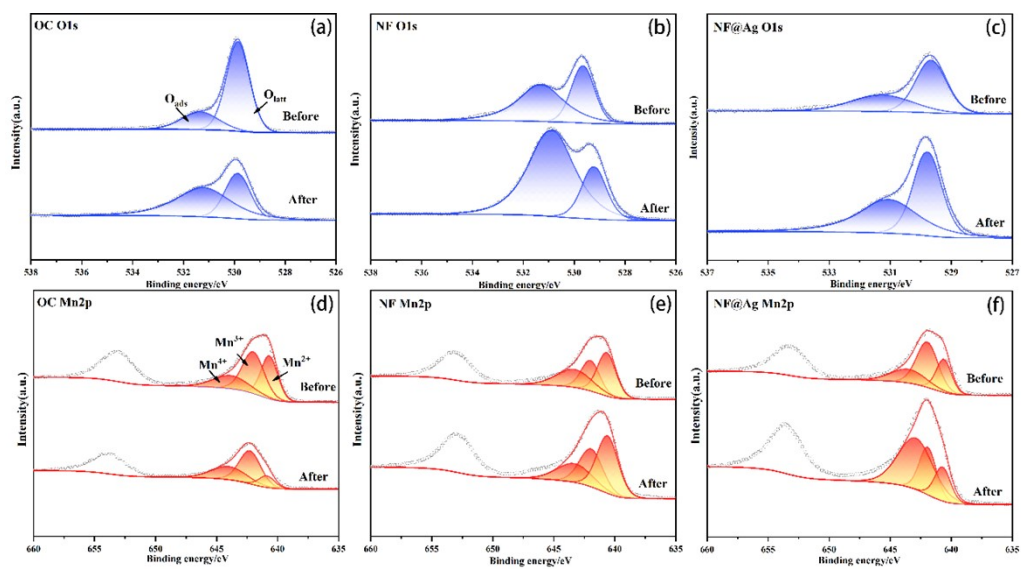

Fig. S14 XPS spectra of the fresh (marked as before) and used (marked as after)  $Mn_3O_4$ -OC,  $Mn_3O_4$ -NF and  $Mn_3O_4@Ag$ -NF: (a,b,c)O1s;(d,e,f)Mn2p



Table S1 the O<sub>3</sub> decomposition performance over reported MnOx based catalysts

| Catalyst                                             | O <sub>3</sub> Con./ppm | Catalyst amount/mg | WHSV<br>L g <sup>-1</sup> h <sup>-1</sup> | RH      | Activity after 6h |
|------------------------------------------------------|-------------------------|--------------------|-------------------------------------------|---------|-------------------|
| Mn <sub>3</sub> O <sub>4</sub> -NF                   | 20                      | 100                | 600                                       | 50      | 57%               |
| Mn <sub>3</sub> O <sub>4</sub> @Ag-NF<br>(This work) | 20                      | 100                | 600                                       | 50      | 92.5%             |
| Mn <sub>3</sub> O <sub>4</sub> <sup>1</sup>          | 15                      | 100                | 600                                       | 50%     | ~35%              |
| Fe-MnOx <sup>2</sup>                                 | 100                     | 100                | 660                                       | 60      | ~73%              |
| Ce-MnO <sub>2</sub> <sup>3</sup>                     | 50-60                   | 50                 | 300                                       | Dry gas | < 80%             |
| Ce-MnO <sub>2</sub> <sup>4</sup>                     | 40                      | 100                | 600                                       | 45%     | ~97%              |
| MnO <sub>2</sub> @GR <sup>5</sup>                    | 50                      | 100                | 540                                       | 50      | ~72%              |
| Amorphous MnO <sub>2</sub> <sup>6</sup>              | 20                      | 100                | 600                                       | 50      | 100%              |
| Li-K-OMS-2 <sup>7</sup>                              | 45                      | 100                | 660                                       | 60      | ~92%              |
| Ce- $\alpha/\gamma$ -MnO <sub>2</sub> <sup>8</sup>   | 45                      | 100                | 300                                       | 65      | 98%               |
| $\alpha$ -MnO <sub>2</sub> <sup>9</sup>              | 23                      | unknown            | 880                                       | 45      | <60%              |
| Ce-OMS-2 <sup>10</sup>                               | 40                      | 100                | 600                                       | 45      | ~100%             |
| Co-OMS-2 <sup>10</sup>                               | 40                      | 100                | 600                                       | 45      | ~70%              |
| Fe-OMS-2 <sup>10</sup>                               | 40                      | 100                | 600                                       | 45      | ~55%              |

Table S2 the chemical properties of used catalysts based on XPS

| Sample                                | Content (%)      |                  |                  | O <sub>ads</sub> /O <sub>latt</sub> |
|---------------------------------------|------------------|------------------|------------------|-------------------------------------|
|                                       | Mn <sup>2+</sup> | Mn <sup>3+</sup> | Mn <sup>4+</sup> |                                     |
| Mn <sub>3</sub> O <sub>4</sub> -OC    | 14.07            | 50.25            | 35.68            | 1.56                                |
| Mn <sub>3</sub> O <sub>4</sub> -NF    | 21.2             | 50.51            | 28.29            | 3.22                                |
| Mn <sub>3</sub> O <sub>4</sub> @Ag-NF | 25.48            | 35.91            | 38.61            | 0.96                                |

## Reference

1. L. Zhang, S. Wang, L. Lv, Y. Ding and D. Tian, *Langmuir*, 2021, 37, 1410-1419.
2. J. B. Jia, W. J. Yang, P. Y. Zhang and J. Y. Zhang, *Appl. Catal. A*, 2017, 546, 79-86.
3. Y. Liu and P. Y. Zhang, *Appl. Catal. A*, 2017, 530, 102-110.
4. L. Yang, J. Ma, X. Li, G. He, C. Zhang and H. He, *J. Environ. Sci. (China)*, 2020, 87, 60-70.
5. G. Zhu, W. Zhu, Y. Lou, J. Ma, W. Yao, R. Zong and Y. Zhu, *Nat. Commun.*, 2021, 12, 4152.
6. S. Liu, J. Ji, Y. Yu and H. Huang, *Catal. Sci. Technol.*, 2018, 8, 4264-4273.
7. W. Hong, J. Z. Ma, T. L. Zhu, H. He, H. N. Wang, Y. Sun, F. X. Shen and X. Li, *Appl. Catal. B*, 2021, 297, 120466.
8. X. Li, J. Ma, C. Zhang, R. Zhang and H. He, *J. Environ. Sci. (China)*, 2020, 91, 43-53.
9. J. Jia, P. Zhang and L. Chen, *Catal. Sci. Technol.*, 2016, 6, 5841-5847.

10. J. Z. Ma, C. X. Wang and H. He, *Appl. Catal. B*, 2017, 201, 503-510.
